# Supplementary material for: Development of a novel diagnostic assay for insulin receptor autoantibodies based on a patient with autoimmune hypoglycaemia
Source: Frontiers journal article supplement (doi:10.3389/fendo.2022.1029297), 2022-10-25
Supplement: Table_1.pdf [file Table_1.pdf]

**Supplemental Table 1. Previous cases of autoimmune hypoglycaemia caused by autoantibodies against the insulin receptor.**

| Patient | Year* | Country/<br>Region | Race   | Gender | Age | Acanthosis<br>nigricans | Fasting<br>insulin | Fasting<br>C-peptide | Underlying disease/<br>Autoantibody              | Clinical course                                                                                                                                             | Ref    |
|---------|-------|--------------------|--------|--------|-----|-------------------------|--------------------|----------------------|--------------------------------------------------|-------------------------------------------------------------------------------------------------------------------------------------------------------------|--------|
| 1       | 1978  | US                 | Creole | F      | 37  | Yes                     | High               | —                    | TBIR/ IRAb                                       | Spontaneous clearing of the acanthosis nigricans over 3 years; Hypoglycaemia persisted and controlled by frequent feeding                                   | [1, 2] |
| 2       | 1978  | US                 | Black  | F      | 38  | Yes                     | —                  | —                    | TBIR, Nephrotic syndrome/ IRAb, ANA              | No remission by immunosuppressive therapy and died from hypoglycaemia after 23 months                                                                       | [1, 2] |
| 3       | 1982  | US                 | Black  | F      | 60  | No                      | Normal             | —                    | TBIR, Hashimoto's thyroiditis/ ANA, IRAb, TPO Ab | Hypoglycaemia remitted by prednisolone therapy but died from the sudden onset of abdominal pain, nausea and vomiting                                        | [3]    |
| 4       | 1983  | Italy              | —      | F      | 46  | No                      | High               | —                    | TBIR, Lupus nephritis/ IRAb                      | Plasmapheresis improved the patient's metabolic status                                                                                                      | [4]    |
| 5       | 1987  | Israel             | —      | M      | 1   | No                      | Low                | Low                  | AIH/ IRAb                                        | Hypoglycaemia remitted by prednisolone therapy                                                                                                              | [5]    |
| 6       | 1987  | US                 | Black  | F      | 43  | Yes                     | High               | —                    | AIH, TBIR/ IRAb                                  | Euglycemia obtained by treatment with prednisolone and cyclophosphamide                                                                                     | [6]    |
| 7       | 1987  | UK                 | —      | F      | 50  | No                      | Low                | Low                  | Hodgkin's disease, AIHA/ IRAb                    | No change by frequent carbohydrate meals; Died from splenomegaly and chemotherapy later                                                                     | [7]    |
| 8       | 1987  | UK                 | —      | M      | 76  | No                      | Low                | Low                  | Hodgkin's disease/ IRAb                          | Poor response to plasmapheresis and azathioprine; Hypoglycaemia remitted by prednisolone after 8-month therapy; Died from deteriorated liver function later | [8]    |

|    |      |           |       |   |    |     |        |      |                                      |                                                                                                                                                                              |          |
|----|------|-----------|-------|---|----|-----|--------|------|--------------------------------------|------------------------------------------------------------------------------------------------------------------------------------------------------------------------------|----------|
| 9  | 1988 | US        | Black | F | 52 | No  | Low    | Low  | SLE/ IRAb, ANA, DNA Ab               | Hypoglycaemia remitted by prednisolone therapy                                                                                                                               | [9]      |
| 10 | 1989 | France    | —     | M | 1  | No  | —      | —    | AIH, AIHA, SCID/ IRAb                | Hypoglycaemia remitted by frequent feeding and prednisolone therapy in 15 days                                                                                               | [10]     |
| 11 | 1989 | US        | —     | F | 24 | No  | Low    | Low  | SLE/ IRAb, ANA, nRNP Ab, SM Ab       | Hypoglycaemia remitted by prednisolone therapy                                                                                                                               | [11]     |
| 12 | 1989 | US        | Black | F | 23 | Yes | High   | —    | DM, TBIR/ IRAb, IAA, ANA             | Died from cardiopulmonary arrest                                                                                                                                             | [12]     |
| 13 | 1989 | Japan     | Asian | M | 62 | Yes | High   | Low  | TBIR/ IRAb, ANA, nRNP Ab, SM Ab      | Not improved by immunosuppressive therapy with cyclophosphamide, prednisolone and methylprednisolone; Discharged with dietary instructions recommending frequent food intake | [13, 14] |
| 14 | 1990 | Hong Kong | Asian | M | 49 | No  | Normal | —    | Hodgkin's disease/ IRAb              | Hypoglycaemia remitted by prednisone therapy within 4 weeks                                                                                                                  | [15]     |
| 15 | 1991 | Italy     | White | F | 59 | No  | Low    | Low  | SLE, TBIR/ IRAb, ANA, dsDNA Ab       | Hypoglycaemia remitted after 10 days of prednisolone therapy                                                                                                                 | [16]     |
| 16 | 1994 | US        | Black | M | 59 | —   | —      | —    | TBIR, AIH/ IRAb                      | Died from severe hypoglycaemia with unconsciousness and dysfunction of multiple organs                                                                                       | [17]     |
| 17 | 1998 | US        | —     | F | 44 | Yes | High   | High | TBIR, AIH, Suspicious SLE/ IRAb, ANA | Euglycemia obtained after treatment of dextrose                                                                                                                              | [18]     |
| 18 | 2000 | Japan     | Asian | F | 50 | Yes | High   | High | SLE, TBIR, AIH/ IRAb, ANA, dsDNA Ab  | Euglycemia obtained after treatment of prednisolone                                                                                                                          | [19]     |

|    |      |        |       |   |    |     |        |        |                                                  |                                                                                                                                                                                                                    |      |
|----|------|--------|-------|---|----|-----|--------|--------|--------------------------------------------------|--------------------------------------------------------------------------------------------------------------------------------------------------------------------------------------------------------------------|------|
| 19 | 2006 | France | White | M | 88 | No  | High   | Normal | Arterial hypertension/<br>IRAb, IAA              | Hypoglycaemia remitted promptly by<br>prednisolone therapy                                                                                                                                                         | [20] |
| 20 | 2007 | US     | Black | F | 61 | Yes | —      | High   | TBIR, AIH/ ANA,<br>TPO Ab, TgAb, IRAb            | Euglycemia obtained by treatment with<br>prednisolone and methylprednisolone                                                                                                                                       | [21] |
| 21 | 2007 | Japan  | Asian | F | 74 | No  | High   | High   | TBIR, AIH/ IRAb,<br>TgAb, IAA                    | Hypoglycaemia remitted by prednisolone<br>therapy                                                                                                                                                                  | [22] |
| 22 | 2008 | Japan  | Asian | F | 23 | Yes | High   | High   | SLE, TBIR, AIH/ IRAb,<br>ANA                     | Euglycemia obtained by treatment with<br>steroid pulse and subsequent high dose of<br>prednisolone; Later died from<br>hemorrhagic shock due to duodenal ulcer<br>and subsequent pneumocystis carinii<br>pneumonia | [23] |
| 23 | 2008 | Japan  | Asian | F | 40 | No  | Normal | Normal | SLE, TBIR/ ANA,<br>dsDNA Ab, ssDNA Ab,<br>SSA Ab | Hypoglycaemia remitted after 2.5 month<br>of prednisolone therapy                                                                                                                                                  | [24] |
| 24 | 2009 | China  | Asian | M | 37 | No  | High   | High   | SLE, AIH/ IRAb, ANA,<br>dsDNA Ab, SM Ab, IAA     | SLE and hypoglycaemia remitted by<br>treatment with prednisone, chloroquine,<br>intravenous cyclophosphamide for 6<br>months                                                                                       | [25] |
| 25 | 2009 | India  | Asian | F | 50 | Yes | —      | —      | SLE, TBIR, AIH/ IRAb,<br>ANA                     | Hyperglycemia corrected by a pulse<br>therapy with intravenous<br>methylprednisolone for 3 days with<br>maintenance dose of steroids and<br>azathioprine; Mild hypoglycaemia<br>controlled by frequent meals       | [26] |

|    |      |             |        |   |    |     |        |        |                                                                                                |                                                                                                                                                                                 |      |
|----|------|-------------|--------|---|----|-----|--------|--------|------------------------------------------------------------------------------------------------|---------------------------------------------------------------------------------------------------------------------------------------------------------------------------------|------|
| 26 | 2011 | Japan       | Asian  | F | 32 | No  | Low    | Low    | AIH/ IRAb, TgAb, Microsome Ab, Platelet Ab                                                     | Immediately remitted after delivery                                                                                                                                             | [27] |
| 27 | 2011 | South Korea | —      | M | 35 | Yes | Normal | Low    | AIH/ IRAb                                                                                      | No response to plasmapheresis; Hypoglycaemia and acanthosis remitted by prednisolone and azathioprine after 17-month therapy                                                    | [28] |
| 28 | 2013 | Japan       | Asian  | F | 72 | No  | —      | Low    | T2D/ IRAb, IAA                                                                                 | Stable glycemia maintained at approximately 7.0% with liraglutide (0.9 mg/day) and gliclazide (20 mg/day)                                                                       | [29] |
| 29 | 2013 | France      | —      | F | 47 | Yes | Low    | Low    | DM/ IRAb                                                                                       | Hypoglycaemia remitted by prednisolone after 5-month therapy; persistent hyperglycemia controlled by insulin therapy                                                            | [30] |
| 30 | 2013 | South Korea | Asian  | F | 38 | No  | High   | High   | SLE, ILD/ IRAb, ANA, dsDNA Ab, SSA Ab, SSB Ab, nRNP Ab                                         | Hypoglycaemia remitted by immunosuppressive therapy including prednisolone, hydroxychloroquine and azathioprine                                                                 | [28] |
| 31 | 2014 | France      | White  | M | 44 | Yes | High   | Normal | SLE, T2D, Acanthosis nigricans/ IRAb, ANA, nRNP Ab                                             | Hypoglycaemia remitted by rituximab after 10-month therapy                                                                                                                      | [31] |
| 32 | 2017 | UK          | Latina | F | 8  | Yes | High   | High   | T1D, SLE, Dermatomyositis, Autoimmune thyroiditis/ IRAb, ANA, dsDNA Ab, GAD65 Ab, TPO Ab, TgAb | Poor response to B-cell immunomodulation, including high-dose corticosteroids, mycophenolate mofetil, rituximab, IVIg, and plasmapheresis; Hypoglycaemia improved by bortezomib | [32] |

|    |      |                |       |   |    |     |      |        |                                                                                                                     |                                                                                                                                                                            |          |
|----|------|----------------|-------|---|----|-----|------|--------|---------------------------------------------------------------------------------------------------------------------|----------------------------------------------------------------------------------------------------------------------------------------------------------------------------|----------|
| 33 | 2018 | US             | Black | F | 60 | Yes | High | High   | SLE, Hashimoto<br>hypothyroidism/ IRAb,<br>TPO Ab                                                                   | Euglycemia obtained after IVIg treatment                                                                                                                                   | [33, 34] |
| 34 | 2021 | Japan          | Asian | M | 59 | Yes | High | Normal | SLE, Lupus nephritis/<br>IRAb, ANA, Ro/SSA<br>Ab                                                                    | Hypoglycaemia remitted by rituximab and<br>glucocorticoids                                                                                                                 | [35]     |
| 35 | 2022 | US             | White | F | 55 | No  | Low  | Low    | TBIR, Mixed<br>connective tissue<br>disease/ IRAb, Sm Ab,<br>U1RNP Ab                                               | Hypoglycaemia remitted by glucose<br>therapy and nocturnal nasogastric feeding                                                                                             | [36]     |
| 36 | 2022 | New<br>Zealand | —     | M | 55 | No  | Low  | Low    | Cardiovascular,<br>Peripheral vascular<br>disease, Hypertension,<br>Dyslipidaemia/ IRAb,<br>ANA, Ro52 Ab, AM2<br>Ab | No further relapse of SLE disease activity<br>or any hypoglycemic episodes after 18<br>weeks the multitarget therapy; Died from a<br>severe cerebral infarction on Day 180 | [37]     |

\*, year of publication; -, unknown or not determined; AIH, autoimmune hypoglycaemia; AIHA, autoimmune haemolytic anaemia; AM2 Ab, anti-adrenomedullin 2 antibody; ANA, anti-nuclear antibody; DM, diabetes mellitus; dsDNA Ab, anti-double strand DNA antibody; GAD65 Ab, anti-glutamic acid decarboxylase autoantibody; IAA, insulin autoantibody; ILD, interstitial lung disease; IRAb, autoantibodies against insulin receptor; IVIg, intravenous immunoglobulin; nRNP Ab, anti-nuclear ribonucleoprotein antibody; SCID, severe combined immunodeficiency; SLE, systemic lupus erythematosus; SM Ab, anti-Smith antibody; SSA Ab, anti-Sjogren syndrome antigen A autoantibody; SSB Ab, anti-Sjogren syndrome antigen B autoantibody; T1D, type 1 diabetes; T2D, type 2 diabetes; TBIR, type B insulin resistance; TgAb, thyroglobulin antibody; TPO Ab, thyroid peroxidase antibody; U1RNP Ab, anti-U1 ribonucleoprotein antibodies.

## Reference:

1. Kahn, C.R., et al., *The syndromes of insulin resistance and acanthosis nigricans: insulin-receptor disorders in man*. New England Journal of Medicine, 1976. **294**(14): p. 739-745.
2. FLIER, J.S., et al., *The evolving clinical course of patients with insulin receptor autoantibodies: spontaneous remission or receptor proliferation with hypoglycemia*. The Journal of Clinical Endocrinology Metabolism, 1978. **47**(5): p. 985-995.
3. Taylor, S.I., et al., *Hypoglycemia associated with antibodies to the insulin receptor*. New England Journal of Medicine, 1982. **307**(23): p. 1422-1426.
4. Tardella, L., et al., *Circulating anti-insulin receptor antibodies in a patient suffering from lupus nephritis and hypoinsulinemic hypoglycaemia*. Journal of clinical laboratory immunology, 1983. **12**(3): p. 159-165.
5. Elias, D., et al., *Antibodies to insulin receptor followed by anti-idiotypic antibodies to insulin in child with hypoglycemia*. Diabetes, 1987. **36**(3): p. 348-354.
6. Sims, R.E., et al., *Successful immunosuppressive therapy in a patient with autoantibodies to insulin receptors and immune complex glomerulonephritis*. Southern Medical Journal, 1987. **80**(7): p. 903-906.
7. Walters, E., et al., *Hypoglycaemia due to an insulin-receptor antibody in Hodgkin's disease*. The Lancet, 1987. **329**(8527): p. 241-243.
8. Braund, W., et al., *Autoimmunity to insulin receptor and hypoglycaemia in patient with Hodgkin's disease*. The Lancet, 1987. **329**(8527): p. 237-240.
9. Moller, D.E., et al., *Autoantibodies to the insulin receptor as a cause of autoimmune hypoglycemia in systemic lupus erythematosus*. The American journal of medicine, 1988. **84**(2): p. 334-338.
10. Rochet, N., et al., *Hypoglycaemia induced by antibodies to insulin receptor following a bone marrow transplantation in an immunodeficient child*. Diabetologia, 1989. **32**(3): p. 167-172.
11. Howard, R.L., L.K. Beck, and A. Schneebaum, *Systemic lupus erythematosus presenting as hypoglycemia with insulin receptor antibodies*. Western Journal of Medicine, 1989. **151**(3): p. 324.
12. BLOISE, W., et al., *Atypical antiinsulin receptor antibodies in a patient with type B insulin resistance and scleroderma*. The Journal of Clinical Endocrinology Metabolism, 1989. **68**(1): p. 227-231.
13. Kiyokawa, H., et al., *Hyperinsulinemia due to impaired insulin clearance associated with fasting hypoglycemia and postprandial hyperglycemia: an analysis of a patient with antiinsulin receptor antibodies*. The Journal of Clinical Endocrinology Metabolism, 1989. **69**(3): p. 616-621.
14. Ishimura, E., et al., *Combination of glomerulonephritis with diabetic glomerulopathy in a patient with diabetes mellitus due to autoantibody to insulin receptor*. Nephron, 1994. **66**(1): p. 105-107.
15. Chan, J.C., et al., *Hypoglycaemia and Hodgkin's disease*. British journal of haematology, 1990. **76**(3): p. 434-436.
16. PAOLO, S.D. and R. GIORGINO, *Insulin resistance and hypoglycemia in a patient with systemic lupus erythematosus: description of antiinsulin receptor antibodies*

*that enhance insulin binding and inhibit insulin action.* The Journal of Clinical Endocrinology Metabolism, 1991. **73**(3): p. 650-657.

17. O'Brien, T.D., et al., *Islet amyloidosis in a patient with chronic massive insulin resistance due to antiinsulin receptor antibodies.* The Journal of Clinical Endocrinology, 1994. **79**(1): p. 290-292.
18. Freeland, B.S., R.E. Paglia, and D.L. Seal, *Clinical challenges of type B insulin resistance: a case study.* The Diabetes Educator, 1998. **24**(6): p. 728-733.
19. Yamasaki, H., et al., *Anti-insulin receptor autoantibodies in a patient with type B insulin resistance and fasting hypoglycemia.* Acta diabetologica, 2000. **37**(4): p. 189-196.
20. Bortolotti, D., et al., *Spontaneous hypoglycaemia in the presence of both anti-insulin antibody and anti-insulin receptor antibody.* Diabetes metabolism, 2006. **32**(6): p. 598-603.
21. Fareau, G.G., et al., *Regression of acanthosis nigricans correlates with disappearance of anti-insulin receptor autoantibodies and achievement of euglycemia in type B insulin resistance syndrome.* Metabolism, 2007. **56**(5): p. 670-675.
22. Kato, T., et al., *Severe hypoglycaemia in a person with insulin autoimmune syndrome accompanied by insulin receptor anomaly type B.* Diabetic medicine, 2007. **24**(11): p. 1279-1281.
23. Nagayama, Y., et al., *Type B insulin resistance syndrome induced by increased activity of systemic lupus erythematosus in a hemodialysis patient.* Clinical nephrology, 2008. **69**(2): p. 130-134.
24. Kato, Y., Y. Ichiki, and Y. Kitajima, *A case of systemic lupus erythematosus presenting as hypoglycemia due to anti-insulin receptor antibodies.* Rheumatology international, 2008. **29**(1): p. 103-105.
25. Qing, Y., J. Zhou, and G. Yuan, *Systemic lupus erythematosus presenting as hypoglycaemia with insulin receptor antibodies and insulin autoantibodies.* Lupus, 2009. **18**(5): p. 457-459.
26. Ostwal, V. and J. Oak, *Type B insulin resistance in a systemic lupus erythematosus patient.* International Journal of Rheumatic Diseases, 2009. **12**(2): p. 174-176.
27. Toshihiro, M., et al., *Recurrent hypoglycemia during pregnancies in a woman with multiple autoantibodies including anti-insulin receptor antibody and anti-platelet antibody, whose serum lowered murine blood glucose levels and phosphorylated insulin receptor of CHO-IR cells.* Endocrine journal, 2011: p. 1109090623-1109090623.
28. Chon, S., et al., *Autoimmune hypoglycemia in a patient with characterization of insulin receptor autoantibodies.* Diabetes Metabolism 2011. **35**(1): p. 80-85.
29. Kawanami, D., et al., *Successful control of a case of severe insulin allergy with liraglutide.* Journal of Diabetes Investigation, 2013. **4**(1): p. 94-96.
30. Maiza, J.-C., et al., *Anti-insulin receptor antibodies related to hypoglycemia in a previously diabetic patient.* Diabetes Care, 2013. **36**(6): p. e77-e77.
31. Bourron, O., et al., *Type B Insulin-resistance syndrome: a cause of reversible autoimmune hypoglycaemia.* The Lancet, 2014. **384**(9953): p. 1548.
32. Shanker, K., et al., *Intractable hypoglycemia in the setting of autoimmune overlap syndrome.* Pediatrics, 2017. **139**(6).
33. Viswanathan, L. and I. Sirisena, *Immunosuppressive therapy in treatment of refractory hypoglycemia in type B insulin resistance: a case report.* Journal of the Endocrine

Society, 2017. **1**(12): p. 1435-1439.

34. Deng, X., *Type B Insulin Resistance Presenting as Hypoglycemia*. Journal of Endocrinology and Thyroid Research, 2018. **3**.
35. Temmoku, J., et al., *Effect of a multitarget therapy with prednisolone, mycophenolate mofetil, and tacrolimus in a patient with type B insulin resistance syndrome complicated by lupus nephritis*. Mod Rheumatol Case Rep, 2022. **6**(1): p. 41-46.
36. Petersen, M.C., et al., *Insulin Receptor Autoantibody-mediated Hypoglycemia in a Woman With Mixed Connective Tissue Disease*. Journal of the Endocrine Society, 2021.
37. Brown, N., et al., *A typical presentation of type B insulin resistance syndrome with isolated hypoglycaemia and suppressed insulin*. BMJ Case Reports CP, 2022. **15**(2): p. e246523.
